# Supplementary material
Source: PubMed Central journal article supplement (PMC5589087)
Supplement: mmc1.pdf [file mmc1.pdf]

YMTHE, Volume 25

## **Supplemental Information**

**Tumor Antigen and Receptor Densities Regulate**

**Efficacy of a Chimeric Antigen Receptor**

**Targeting Anaplastic Lymphoma Kinase**

**Alec J. Walker, Robbie G. Majzner, Ling Zhang, Kelsey Wanhainen, Adrienne H. Long, Sang M. Nguyen, Paola Lopomo, Marc Vigny, Terry J. Fry, Rimas J. Orentas, and Crystal L. Mackall**

## Supplementary Figures

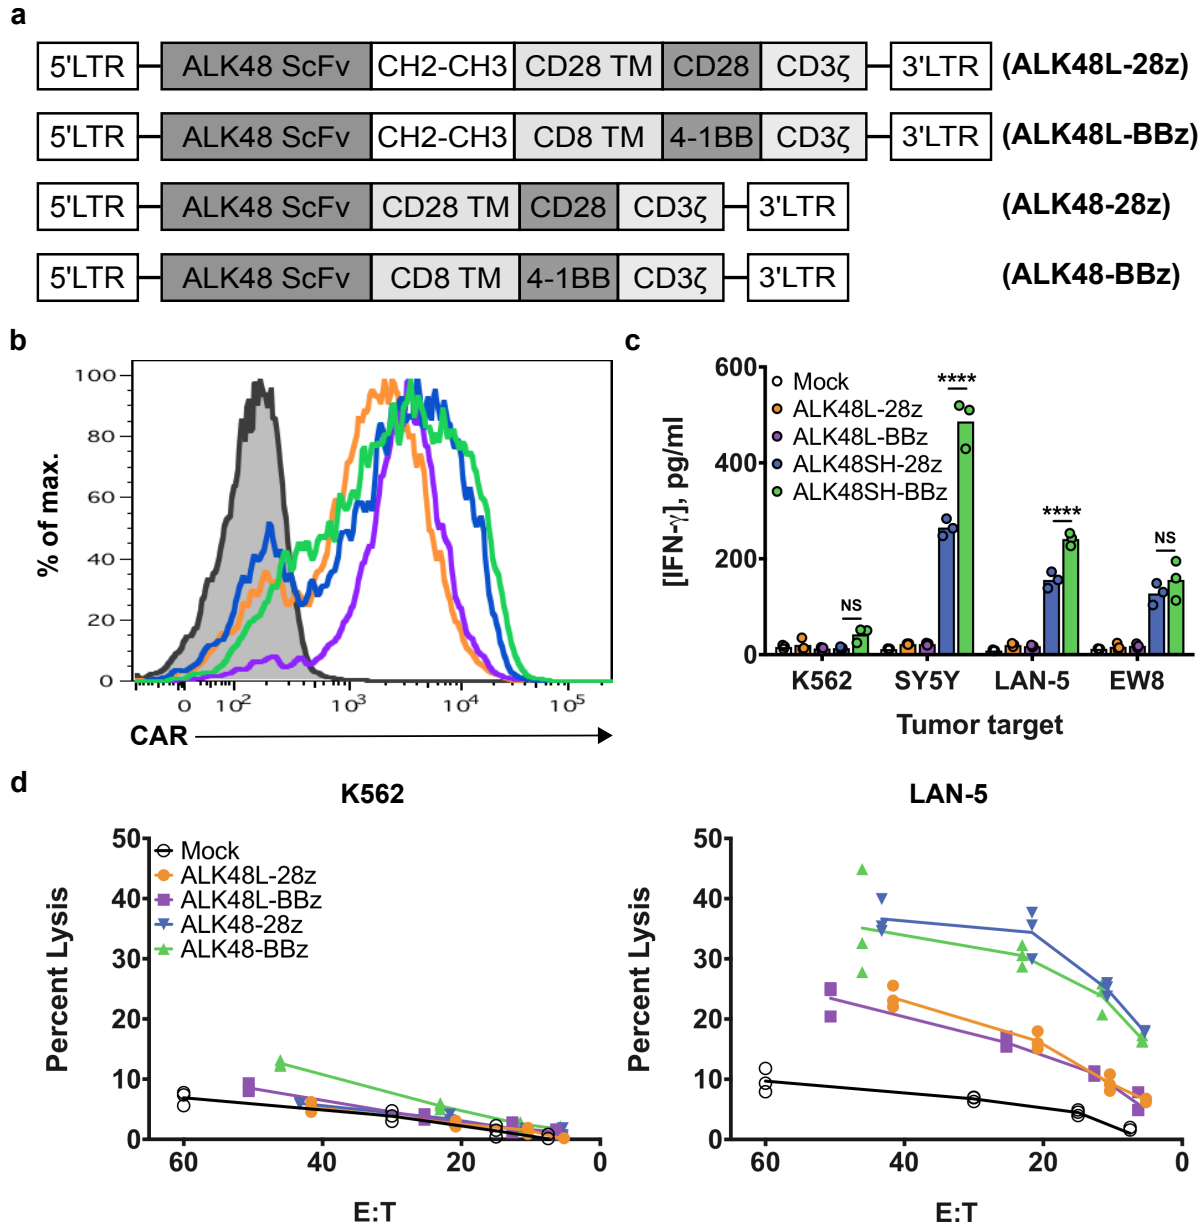

**Figure S1.** Characterization of ALK48 CAR T cells.

The scFv sequence of the ALK48 antibody was used to construct several CARs targeting ALK. The resulting vectors also contained either a CD28 transmembrane/co-stimulatory motif or a CD8a transmembrane/4-1BB costimulatory motif, and a CD3-zeta

signaling domain. “Long” CAR T cells were created by adding the CH2-CH3 sequence of human IgG1 between the scFv and transmembrane domains (**a**). After retroviral transduction, ALK48 CARs expressed on the surface of the human T cells (**b**). Production of IFN-gamma by ALK48 CAR T cells was evaluated after 24-hour co-incubation with ALK<sup>+</sup> tumor cell lines. Differences in cytokine production between CARs was determined by a two-way ANOVA followed by a Tukey’s multiple comparisons test (**c**). Cytolytic activity of ALK48 CAR T cells was assessed in a standard 6-hour <sup>51</sup>Cr release assay against ALK<sup>-</sup> (K562) and ALK<sup>+</sup> (LAN-5) tumor lines (**d**). Cytokine release experiments were repeated with three different PBMC donors and cytolytic activity experiments were repeated with two different PBMC donors.

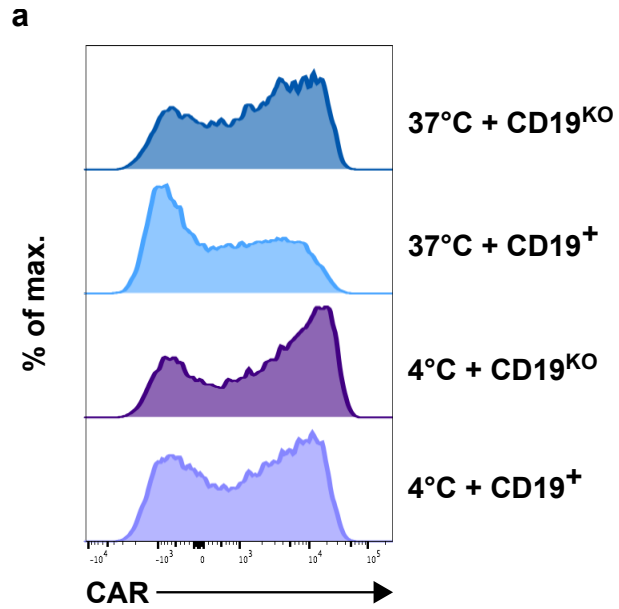

**Figure S2.** CARs do not down-modulate at 4°C.

CD19.4-1BB.ζ-BFP CAR T cells were co-incubated with CD19<sup>+</sup> or CD19<sup>KO</sup> NALM-6-GL tumor cells at 37°C or 4°C for 1 hour. Surface CAR was quantified by flow cytometry. Data is representative of two experiments with different donors (**a**).

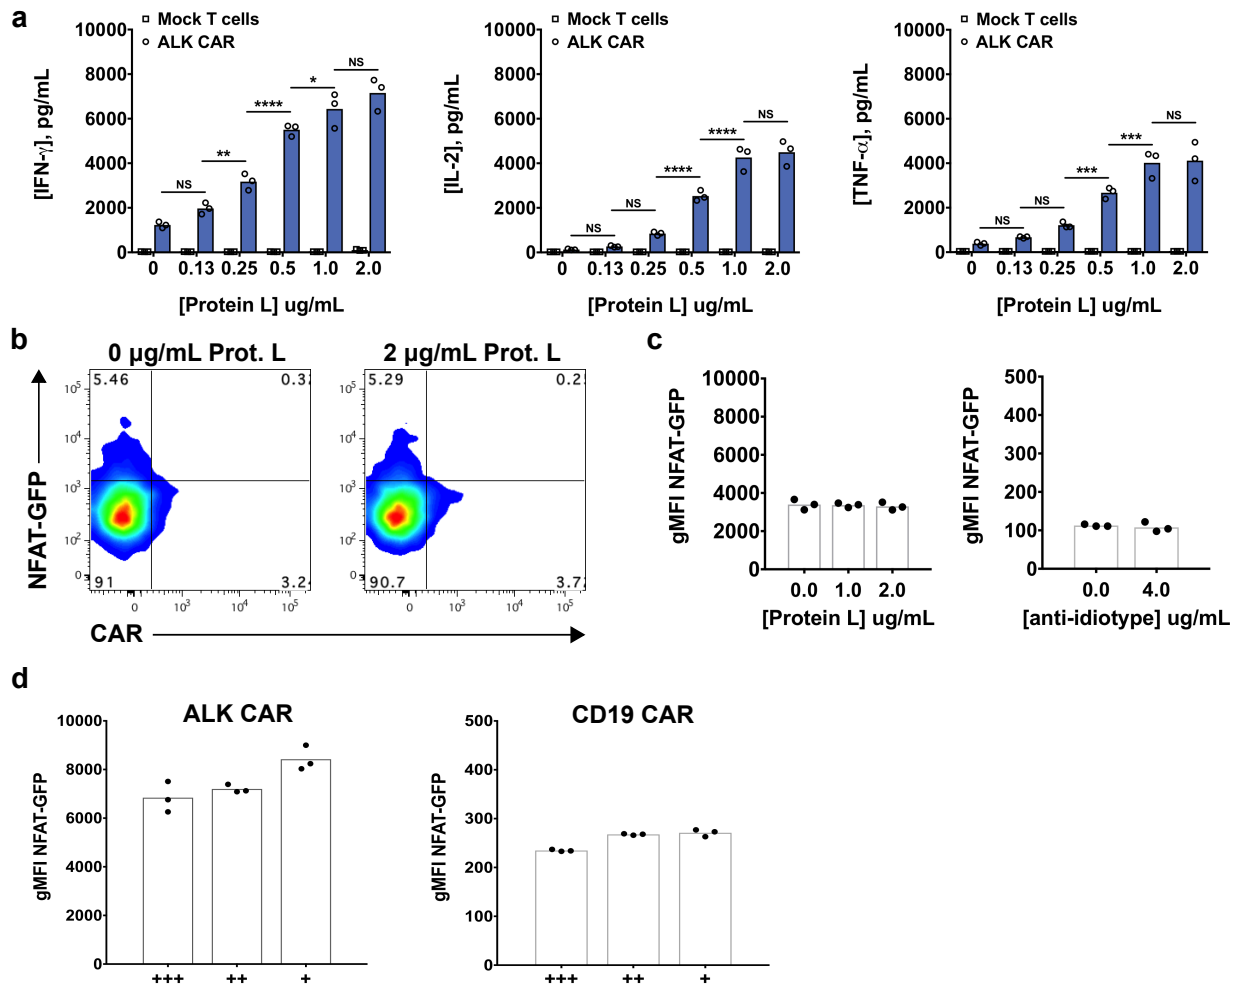

**Figure S3.** Evaluating CAR T cell activity with an NFAT-GFP reporter.

ALK CAR T cells were added to 96-well plates coated with a range of concentrations of biotinylated Protein L and cytokine release assayed. Differences between adjacent levels of protein L stimulation and CAR groups were determined by a two-way ANOVA followed by a Tukey's multiple comparisons test, and are representative of two experiments with different PBMC donors (a). Representative plots and quantification of the geometric mean fluorescence of NFAT-GFP for Mock/NFAT-GFP reporter T cells after stimulation on Protein L or anti-(CD19 scFv)-idiotype antibody coated plates are shown (b) and quantified (c). High (+++), medium

(++), or low (+) CAR expressing (ALK48.4-1BB.ζ or CD19.4-1BB.ζ-BFP)/NFAT-GFP reporter T cells were stimulated for 24 hours with anti-CD3/CD28 beads and evaluated by flow cytometry for NFAT-GFP expression (**d**). NFAT-GFP reporter data is representative of the three experiments each with the ALK CAR and CD19 CAR as described in Figure 5.
